# Supplementary material for: Antioxidant nanozyme counteracts HIV‐1 by modulating intracellular redox potential
Source: PubMed Central journal article supplement (PMC8103102; doi:10.15252/emmm.202013314), 2021-04-01

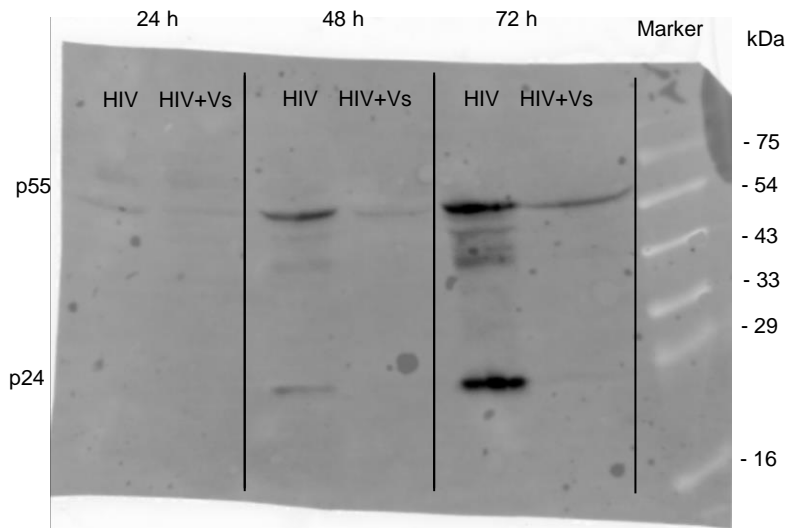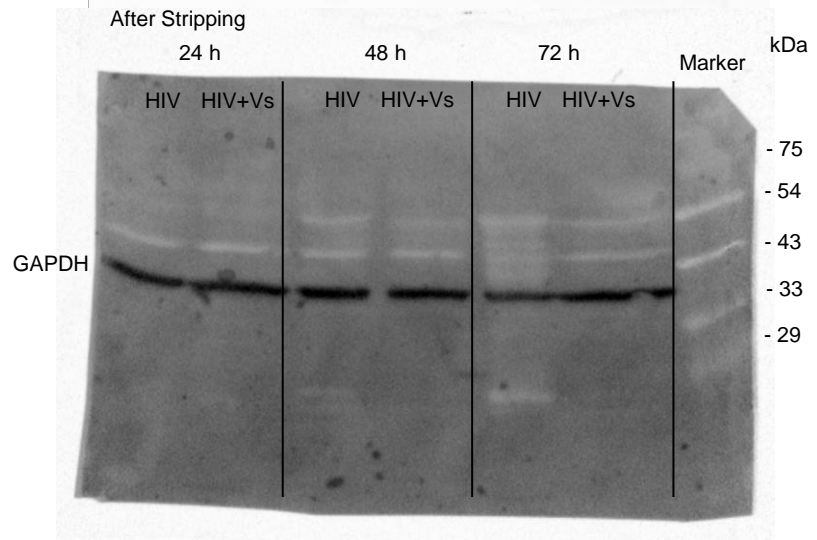

Supplement: EMMM-13-e13314-s001.pdf [file EMMM-13-e13314-s001.pdf]
