# Supplementary material for: Antioxidant nanozyme counteracts HIV‐1 by modulating intracellular redox potential
Source: PubMed Central journal article supplement (PMC8103102; doi:10.15252/emmm.202013314), 2021-04-01
Supplement: EMMM-13-e13314-s003.pdf [file EMMM-13-e13314-s003.pdf]

1 **Antioxidant nanozyme counteracts HIV-1 by modulating intracellular redox potential**

2

3 Shalini Singh<sup>1, 2</sup>, Sourav Ghosh<sup>3</sup>, Virender Kumar Pal<sup>1, 2</sup>, MohamedHusen Munshi<sup>2</sup>, Pooja  
4 Shekhar<sup>4</sup>, Diwakar Tumkur Narasimha Murthy<sup>5</sup>, Govindasamy Mugesh<sup>3\*</sup>, and Amit Singh<sup>1, 2\*</sup>

5

6 <sup>1</sup>Department of Microbiology and Cell Biology, Indian Institute of Science, Bangalore-  
7 560012, India

8 <sup>2</sup>Centre for Infectious Disease Research (CIDR), Indian Institute of Science, Bangalore  
9 560012, India

10 <sup>3</sup>Department of Inorganic and Physical Chemistry, Indian Institute of Science, Bangalore  
11 560012, India.

12 <sup>4</sup>Bangalore Medical College and Research Institute, Bangalore – 560002

13 <sup>5</sup>Department of Internal Medicine, Bangalore Medical College and Research Institute,  
14 Bangalore – 560002

15

16

17 **\* Correspondence:**

18 Amit Singh ([asingh@iisc.ac.in](mailto:asingh@iisc.ac.in)) and Govindasamy Mugesh ([mugesh@iisc.ac.in](mailto:mugesh@iisc.ac.in))

19

20 **Running Title -** Anti-HIV potential of V<sub>2</sub>O<sub>5</sub>-nanosheets

21

22 **Supplementary Material (SI Appendix)**

23

24

25 Appendix Fig S1. Survival assay for Vs-treated J1.1 cells.

26 Appendix Fig S2. XRD pattern and TEM of Vs

27 Appendix Fig S3. GR- coupled assay for Vs under varied conditions.

28 Appendix Fig S4. Preparation of Stable cell lines.

29 Appendix Fig S5. Time dependent induction of Selenium (Se) starvation-mediated oxidative  
30 stress.

31 Appendix Fig S6. HIV inhibitory activity of Vs is reversible.

32 Appendix Fig S7. Expression of antioxidant genes in primary CD4<sup>+</sup> T cells are lowered upon  
33 Vs exposure.

34 Appendix Fig S8. Viability of primary CD4<sup>+</sup> T cells is not affected by Vs treatment.

35 Appendix Table S1. List of Genes and probes used for nCounter Gene Expression analysis

36 Appendix Table S2. Normalized intensity values of differentially expressed gene in nCounter  
37 Gene Expression Assay

38 Appendix Table S3. Fold change (FC>1.5, p<0.05) of differentially expressed gene in  
39 nCounter Gene Expression Assay

40 Appendix Table S4. Details of HIV-infected subjects used in the study.

41 Appendix Table S5. List of primers used in the study.

42

43 **Appendix Figures**

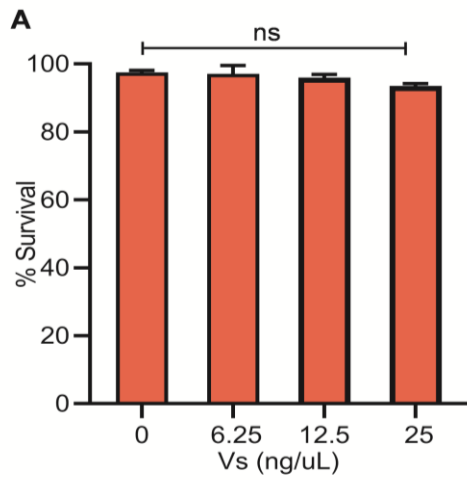

44

45 **Appendix Fig S1. Survival assay for Vs-treated J1.1 cells.**

46 **A.** J1.1 cells were treated with increasing concentrations of Vs – 6.25 to 25 ng/μL- for 15 min  
47 and cell survival was analysed by flow cytometry after 24 h by propidium iodide (PI)  
48 staining. Data are representative of two independent experiments done in duplicate (mean ±  
49 SEM). ns - non-significant by Student's *t* test.

50

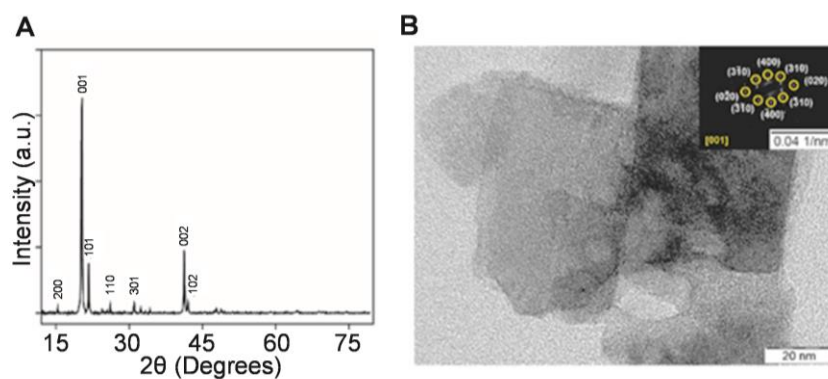

51

52 **Appendix Fig S2. XRD pattern and TEM of Vs.**

53 **A.** Powder XRD of Vs where all the diffraction peaks were indexed to standard  $V_2O_5$   
 54 orthorhombic phase (JCPDS = 41-1426, space group Pmmn).

55 **B.** Transmission electron microscopy (TEM) image of Vs thin nanosheets (scale – 20 nm)  
 56 and selected area electron diffraction (SAED) (inset) shows the crystalline nature of the  
 57 material.

58

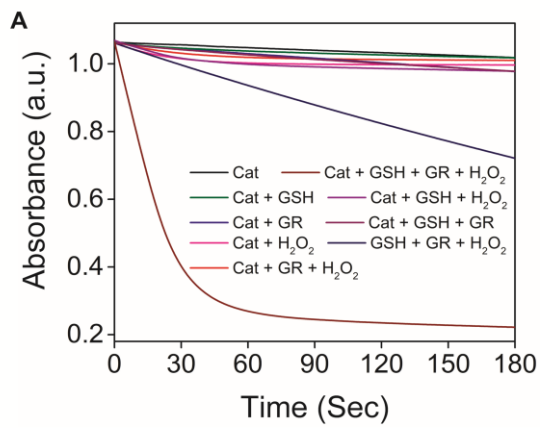

59

60 **Appendix Fig S3. GR- coupled assay for Vs under varied conditions.**

61 **A.** The decrease in absorbance of NADPH (0.2 mM under different assay conditions were  
 62 monitored during GR coupled assay.

63

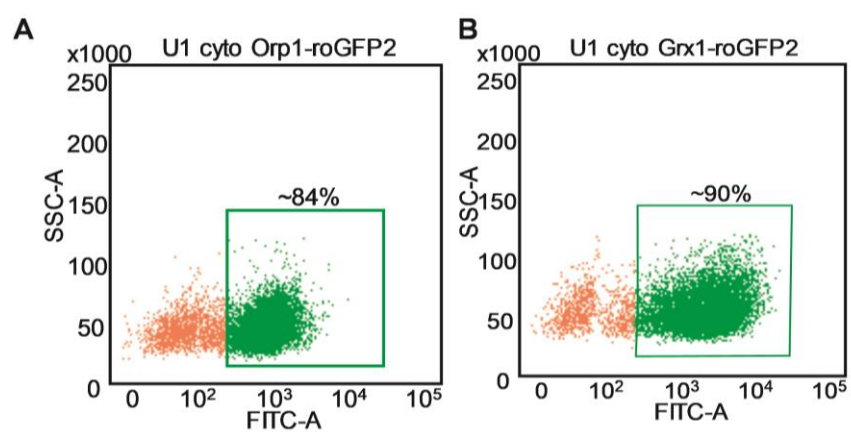

64

65 **Appendix Fig S4. Preparation of Stable cell lines.**

66 **A, B.** Dot plot validating the stable expression of the biosensors in **(A)** U1 cyto-Orp1-roGFP2  
67 and **(B)** U1 cyto-Grx1-roGFP2 cell lines.

68

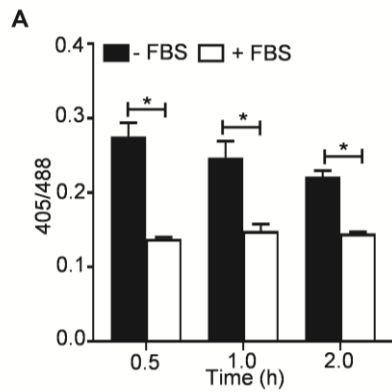

69

70 **Appendix Fig S5. Time dependent induction of Selenium (Se) starvation-mediated**  
 71 **oxidative stress.**

72 **A.** U1-Grx1-roGFP2 cells were cultured in serum free medium (to deplete Se) for various  
 73 time periods and biosensor response was measured by flow cytometry. Data are  
 74 representative of two experiments done in duplicates (mean  $\pm$  SEM). \*  $P < 0.05$ , by Mann  
 75 Whitney test.

76

77

78

79

80

81

82

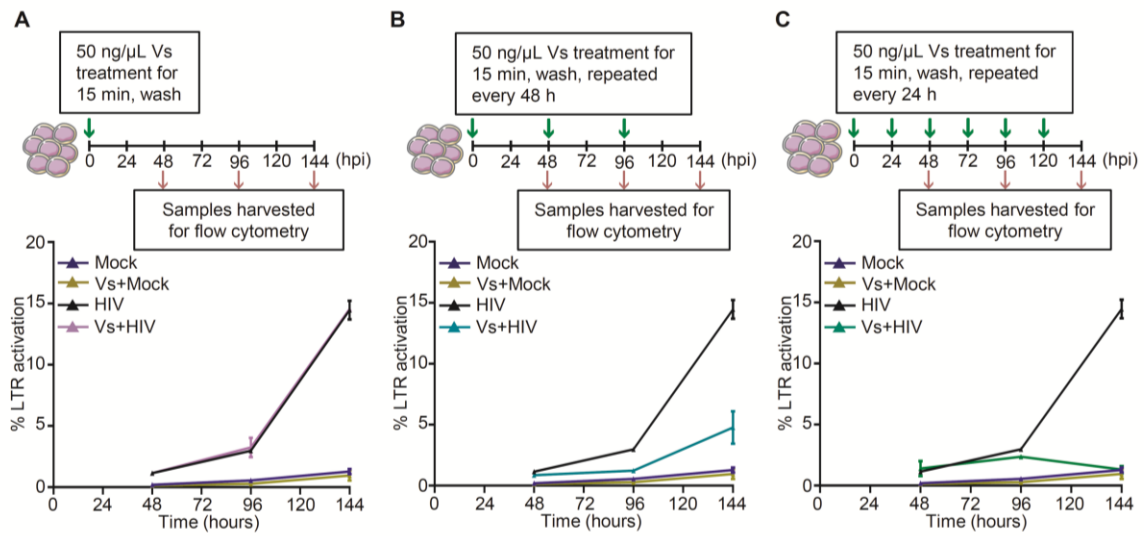

84

### 85 **Appendix Fig S6. HIV inhibitory activity of Vs is reversible.**

86 **A-C.** CEM-GFP cells pre-treated with 50 ng/μL of Vs were infected with 0.1 moi of HIV-  
 87 NL4.3. Vs treatment was continued for different time points during the experiment - (A)  
 88 single dose (pre-treatment only), (B) treatment every 48 h and (C) treatment every 24 h.  
 89 EGFP fluorescence was analysed by flow cytometry at 2, 4, and 6 dpi. Experiment was  
 90 performed once in duplicate (mean ± SD).

91



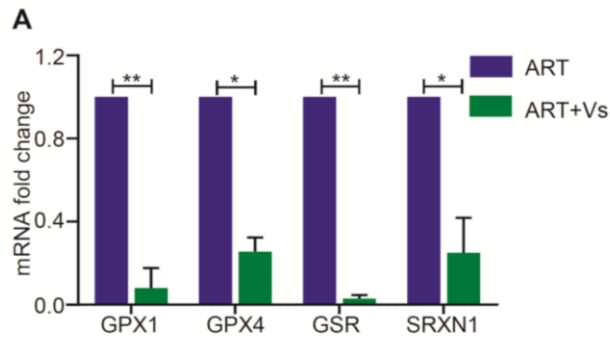

92  
 93 **Appendix Fig S7. Expression of antioxidant genes in primary CD4<sup>+</sup> T cells are lowered**  
 94 **upon Vs exposure.**

95 **A.** ARV or Vs + ARVs treated cells were cultured for 21 days under standard conditions (*see*  
 96 *Materials and Methods*). 21 days post culturing, RNA was isolated and expression of  
 97 antioxidant genes, GPX1, GPX4, GSR, and SRXN1 were analysed by RT-qPCR. Data are  
 98 representative of three donors. \*\* P<0.01, \* P<0.05, ns – non-significant by 2-way ANOVA  
 99 with Sidak's multiple comparison.

100

101

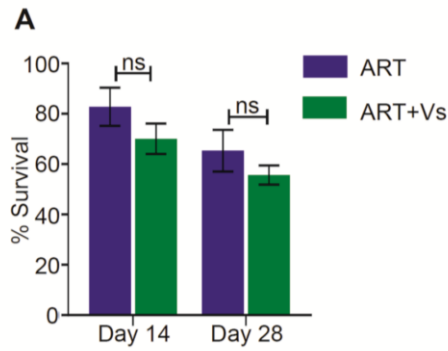

102

103 **Appendix Fig 8. Viability of primary CD4<sup>+</sup> T cells is not affected by Vs treatment.**

104 **A.** Primary CD4<sup>+</sup> T cells isolated from ARV-suppressed individuals were culture in presence  
 105 of ARV alone or Vs + ARV (*as mentioned in Materials and Methods*). At day 14 and day 28  
 106 ARV and ARV+Vs treatment, cells were stained with Aqua Dead Cell staining dye and cell  
 107 viability was analysed using flow cytometry. Data are representative of three donors. ns –  
 108 non-significant by 2-way ANOVA with Sidak's multiple comparison.

109

110

111 **Appendix Table**

112 **Appendix Table S1. List of Genes and probes used for nCounter Gene Expression**

113 **analysis.**

| Gene Name | Target sequence                                                                                           |
|-----------|-----------------------------------------------------------------------------------------------------------|
| ABCF1     | GATGTCTCCCGCCAAGCCATGTTAGAAAATGCATCTGACATCAAGCTGGAGAAGTTCAGCATCTCCGCTCATGGCAAGGAGCTGTTTCGTCAA<br>TGCAGAC  |
| ACTB      | TGCAGAAGGAGATCACTGCCCTGGCACCCAGCACAAATGAAGATCAAGATCATTGCTCCTCCTGAGCGCAAGTACTCCGTGTGGATCGGCGGCT<br>CCATCCT |
| AHCY      | ATCCTTGGCCGGCACTTTGAGCAGATGAAGGATGATGCCATTGTGTGTAACATTGGACACTTTGACGTGGAGATCGATGTCAAGTGGCTCAAC<br>GAGAACG  |
| AKR1C2    | CTGCAGAGGTTCTAAAAGTAAAGCTCTAGAGGCCGTCAAATTGGCAATAGAAGCCGGGTTCCACCATATTGATTCTGCACATGTTTACAATA<br>ATGAGGA   |
| ALB       | TCTTACCAAAGTCCACACGGAATGCTGCCATGGAGATCTGCTTGAATGTGCTGATGACAGGGCGGACCTTGCCAAGTATATCTGTGAAAATCA<br>AGATTTCG |
| ALOX12    | TTACAGCCCGGAATGAGCAACTTGACTGGCCCTATGAATATCTGAAGCCAGCTGCATAGAGAACAGTGTCCACCATCTGAGCCCTAGAGTGAC<br>TCTACCT  |
| AOX1      | GCGATAGTCAATTCAGGAATGAGAGTCTTTTTTGGAGAAGGGGATGGCATTATTAGAGAGTTATGCATCTCATATGGAGGCGTTGGTCCAGCC<br>ACCATCT  |
| APOBEC3G  | GAAAAGAGACGGTCCGCGTGCCACCATGAAGATCATGAATTATGACGAATTTTCAGCACTGTTGGAGCAAGTTCGTGTACAGCCAAAGAGAGCT<br>ATTTGAG |
| APOE      | GGGCTGCGTTGCTGGTCACATTCTGGCAGGATGCCAGGCCAAGGTGGAGCAAGCGGTGGAGACAGAGCCGGAGCCCGAGCTGCGCCAGCAG<br>ACCGAGTG   |
| ATOX1     | GCTGAAGCTGTCTCTCGGGTCTCAATAAGCTTGGAGGAGTTAAGTATGACATTGACCTGCCCAACAAGAAGGTCTGCATTGAATCTGAGCAC<br>AGCATGG   |
| B2M       | CGGGCATTCTGAAGCTGACAGCATTCCGGCCGAGATGTCTCGCTCCGTGGCCTTAGCTGTGCTCGCGCTACTCTCTTTTCTGGCCTGGAGGC<br>TATCCA    |
| BAD       | AGGGAGGGCTGACCCAGATTCCCTTCCGGTGCCTGTGAAGCCACGGAAGGCTTGGTCCCATCGGAAGTTTTGGGTTTTCCGCCACAGCCGCC<br>GGAAGTG   |
| BAG2      | AAGAGTCATTTAATGTCGCTCTACAGTGCATGTTTCATCTGAGGTGCCACATGGGCCAGTTGATCAGAAGTTTCAATCCATAGTAATTGGCTGTG<br>CTCTTG |
| BANF1     | GGAGGAAAGGGGTTTTGACAAGGCCTATGTTGTCTTGGCCAGTTTCTGGTGCTAAAGAAAAGATGAAGACCTCTTCCGGGAATGGCTGAAAGA<br>CACTTGT  |
| BAX       | TTTTTCCGAGTGGCAGCTGACATGTTTTCTGACGGCAACTTCAACTGGGGCCGGGTTGTCGCCCTTTTCTACTTTGCCAGCAAAGTGGTGCTCAA<br>GGCCC  |
| BCL2      | GTGAAGCAGAAGTCTGGGAATCGATCTGGAAATCCTCCTAATTTTTACTCCCTCTCCCCGCGACTCCTGATTCATTGGGAAGTTTCAAATCAGC<br>TATAAC  |
| BHMT      | CGCAGCGGGAAGGCTCGCCTAGTCGGTCCGCATCCGTGTCGACCACCTGTCTGGACACCACGAAGATGCCACCCGTTGGGGGCAAAAAGGCCA<br>AGAAGGG  |
| BNIP3     | AGGGGGCATATTCTCTGCAGAATTTCTGAAAGTTTTCTTCCATCTCTGCTGCTCTCTCATTGCTGGCCATCGGATTGGGGATCTATATTGGAA<br>GGCGT    |

|       |                                                                                                            |
|-------|------------------------------------------------------------------------------------------------------------|
| BTRC  | ACACCTACATCTCCAGATAAATAACCATACTGACCTCATACTTGCCAGGACCCATTAAGTTGCGGTATTTAACGTATCTGCCAATACCAG<br>GATGAG       |
| CASP3 | ACTCCACAGCACCTGGTTATTATTCTTGGCGAAATTCAAAGGATGGCTCCTGGTTCATCCAGTCGCTTTGTGCCATGCTGAAACAGTATGCCGA<br>CAAGCT   |
| CASP8 | AGATGGACTTCAGCAGAAATCTTTATGATATTGGGGAACAACACTGGACAGTGAAGATCTGGCCTCCCTCAAGTTCCTGAGCCTGGACTACATTCC<br>GCAAAG |
| CAT   | ATGCTTCAGGGCCGCCTTTTTGCCTATCCTGACACTCACCGCCATCGCCTGGGACCCAATTATCTTCATATACCTGTGAACTGTCCCTACCGTGC<br>TCGAG   |
| CBS   | GCGGGAGCGTGAAGGACCGCATCAGCCTGCGGATGATTGAGGATGCTGAGCGCGACGGGACGCTGAAGCCCGGGGACACGATTATCGAGCCG<br>ACATCCGG   |
| CBX5  | TATGAAGAGAGACTGACATGGCATGCATATCCTGAGGATGCGGAAAACAAAGAGAAAGAAACAGCAAAGAGCTAAAGGAGGGGATGGTCTC<br>TGTCATTTT   |
| CCL2  | GAGGAACCGAGAGGCTGAGACTAACCCAGAAACATCCAATTCTCAAACCTGAAGCTCGCACTCTCGCCTCCAGCATGAAAGTCTCTGCCGCCCT<br>TCTGTGC  |
| CCL3  | CTGTGTAGGCAGTCATGGCACCAAAGCCACCAGACTGACAAATGTGTATCGGATGCTTTTGTTCAGGGCTGTGATCGGCCTGGGAAATAATA<br>AAGATGC    |
| CCL4  | GAAGCTTCTCGCAACTTTGTGGTAGATTACTATGAGACCAGCAGCCTCTGCTCCCAGCCAGCTGTGGTATTCCAAACCAAAGAAGCAAGCA<br>AGTCTGT     |
| CCL5  | AGTGTGTGCCAACCCAGAGAAGAAATGGGTTTCGGGAGTACATCAACTCTTTGGAGATGAGCTAGGATGGAGAGTCCTTGAACCTGAACTTACA<br>CAAATTT  |
| CCL8  | AAGGAGAGATGGGTCAGGGATTCCATGAAGCATCTGGACCAAATATTTCAAATCTGAAGCCATGAGCCTTCATACATGGACTGAGAGTCAGA<br>GCTTGAA    |
| CCNT1 | GCACAAGACTCACCCATCTAATCATCATCATCATAATCACCACTCACACAAGCACTCTCATTCCCAACTCCAGTTGGTACTGGGAACAAA<br>CGTCCT       |
| CCR2  | TCTGATCTGCTTTTTCTTATTACTCTCCCATTGTGGGCTCACTCTGCTGCAAATGAGTGGGTCTTTGGGAATGCAATGTGCAAATTATTCACAGG<br>GCTGT   |
| CCR3  | CAGTGCTCTTTACCCAGAGGATACAGTATATAGCTGGAGGCATTTCCACACTCTGAGAATGACCATCTTCTGTCTCGTTCTCCCTCTGCTCGTTA<br>TGGCC   |
| CCR4  | TCCCTTCTGGCTTTCTGTTTTCAGCACTTGTTATACTGAGCGCAACCATACTACTGCAAAACCAAGTACTCTCTCAACTCCACGACGTGGAAGG<br>TTCTCA   |
| CCR5  | TAGGAACATACTTCAGCTCACACATGAGATCTAGGTGAGGATTGATTACCTAGTAGTCATTTTCATGGGTTGTTGGGAGGATTCTATGAGGCAAC<br>CACAGG  |
| CCS   | GGGTCCAGAATGGCTTCGGATTCGGGGAACCAGGGGACCCCTCTGCACGTTGGAGTTCGCGGTGCAGATGACCTGTCAGAGCTGTGTGGACGCG<br>GTGCGCA  |
| CD209 | TAGAGCTTGTTTTTCTGGCCATCCTTGGAGCTTTATGAGTGAGCTGGTGTGGGATGCCTTTGGGGGTGGACTTGTGTTCCAAGAATCCACTCTC<br>TCTTC    |
| CD247 | TGGCAGGACAGGAAAAACCCGTCAATGTACTAGGATACTGCTGCGTCATTACAGGGCACAGGCCATGGATGGAAAACGCTCTCTGCTCTGCTT<br>TTTTTCT   |

|        |                                                                                                        |
|--------|--------------------------------------------------------------------------------------------------------|
| CD4    | TGGCAGGCGGAGAGGGCTTCCTCCTCCAAGTCTTGGATCACCTTTGACCTGAAGAACAAGGAAGTGTCTGTAAAACGGGTACCCAGGACCCTAAGCTCC    |
| CD44   | ACACCATGGACAAGTTTTGGTGGCACGCAGCCTGGGGACTCTGCCTCGTGCCGCTGAGCCTGGCGCAGATCGATTTGAATATAACCTGCCGCTTTGCGAGG  |
| CD69   | AGGACATGAACTTTCTAAAACGATACGCAGGTAGAGAGGAACACTGGGTTGGACTGAAAAAGGAACCTGGTCACCCATGGAAGTGGTCAAATGGCAAAGA   |
| CD74   | TTCAGCCCCCAGCCCCCTCCCCATCTCCACCCTGTACCTCATCCCATGAGACCCTGGTGCCTGGCTCTTTCGTCACCCTTGACAAGACAAACC AAGTC    |
| CDK7   | CTGAGGAACAGTGGCCGGACATGTGTAGTCTTCCAGATTATGTGACATTTAAGAGTTTCCCTGGAATACCTTTGCATCACATCTTCAGTGCAGCAGGAGA   |
| CDK9   | GGTGTTCGACTTCTGCGAGCATGACCTTGCTGGGCTGTTGAGCAATGTTTTGGTCAAGTTCACGCTGTCTGAGATCAAGAGGGTGTATGCAGATGCTGCTT  |
| CDKN1A | CATGTGTCCTGGTTCCCGTTTCTCCACCTAGACTGTAAACCTCTCGAGGGCAGGGACCACACCCTGTACTGTTCTGTGTCTTTCACAGCTCCTCC CACAA  |
| CDO1   | TGAATAATAGAGGAACTTACGGCACTCTGCCATTTGTTAATGAAAGGAAGTGCAGAGGATTTAGAAAAGTACATGATCCCCAGACCACAACAA ACCAAAA  |
| CEBPB  | CAACCGCACATGCAGATGGGGCTCCCGCCCGTGGTGTATTTAAAGAAGAAACGTCTATGTGTACAGATGAATGATAAACTCTCTGCTTCTCCCTCTGCC    |
| COPS6  | CAGATTTTTATGATCAATGCAACGACGTGGGGCTCATGGCCTACCTCGGCACCATCACAAAACGTGCAACACCATGAACCAGTTTGTGAACAAGTTCAA    |
| CR2    | GGTGTCAAGCAAATAATATGTGGGGCCGACACGACTACCAACCTGTGTAAGTGTTCCTCTCGAGTGTCCAGCACTTCTATGATCCACAA TGGACA       |
| CSAD   | CTGCACTGACCTGTGCTGATATGGACTTCCCTCCTCAACGAGCTGGAGCGGCTAGGCCAGGACCTGTGAGCCTTCTCTGTCTTGCTGCCGCTT GATACC   |
| CTH    | CCTCTGCAATCGAGGTCTGAAGACTCTACATGTCCGAATGGAAGCATTTCAAAAACGGAATGGCAGTTGCCAGTTCTGGAATCTAATCC TTGGGTA      |
| CX3CL1 | CCCCGGAGCTGTGGTAGTAATTCATATGTCTGGTGGCCGTGTAACCTCTGGCCTGTGTCTAGTTGTTGATTCAGACAGCTGCCTGGGATC CCTCA       |
| CXCL12 | CCGCCCCCGCCCGCCCGCCGATGAACGCCAAGGTCGTGGTCTGCTGGTCTCGTGCTGACCGCGCTCTGCCTCAGCGACGGGAAGCCCG TCAGCCT       |
| CXCL8  | ACAGCAGAGCACACAAGCTTCTAGGACAAGAGCCAGGAAGAAACCACCGGAAGGAACCATCTCACTGTGTGTAACATGACTTCCAAGCTGG CCGTGGCT   |
| CXCR4  | ATTGATGTGTGTCTAGGCAGGACCTGTGGCCAAGTTCTTAGTTGCTGTATGTCTCGTGGTAGGACTGTAGAAAAGGGAACCTGAACATTCCAGA GCGTGTA |
| CYBB   | TTTGAAGCATGAAAAAAGAGGGTTGGAGGTGGAGAATTAACCTCCTGCCATGACTCTGGCTCATCTAGTCCTGCTCCTTGTGCTATAAAATAAA TGCAGA  |
| CYGB   | AAGCACAAGGTGGAACCGGTGTACTTCAAGATCCTCTCTGGGGTCATTCTGGAGGTGGTCGCCGAGGAATTTGCCAGTGACTTCCCACCTGAG ACGCAGA  |

|         |                                                                                                           |
|---------|-----------------------------------------------------------------------------------------------------------|
| DHCR24  | CAGAGCCCAGCAAGCTGAATAGCATTGGCAATTACTACAAGCCGTGGTTCTTTAAGCATGTGGAGA ACTATCTGAAGACAAACCGAGAGGGCC<br>TGGAGTA |
| DUOX1   | TGAGCCACACCTCACCTCTGTTCTTCTATTTCTGGCTGCCTCAGCCTTCTCTGATTTCCACCTCCCAACCTTGTTCAGGTGGCCATAGTCAG<br>TCAC      |
| DUOX2   | AGGCACATCGTGTGTGTGGCAATCTTCTCGGCCATCTGTGTTGGCGTGTTCAGATCGTGCTTACTACTATGGCTTTCCTCGCCACCCTCGGA<br>CATTG     |
| DUSP1   | TCAAGAATGCTGGAGGAAGGGTGTTCCTGACTGCCAGGCAGGCATTTCCCGGTCAGCCACCATCTGCCTTGCTTACCTTATGAGGACTAATCG<br>AGTCAA   |
| ELANE   | ACTTCTGCGGCGCCACCCTGATTGCGCCCAACTTCGTGCATGTCGGCCGCGCACTGCGTGGCGAATGTAAACGTCCGCGGGTGGGGTGGTCTT<br>GGGAGC   |
| EP300   | CCAGCCAGGCCCAACAGAGCAGTCTGGATTAGGTTTGATAAATAGCATGGTCAAAGCCCAATGACACAGGCAGGCTTGACTTCTCCAACA<br>TGGGGAT     |
| EPHX2   | AGGAAGTGCTCCGAGACCGCTAAAGTCTGCCTCCCCAAGAATTTCTCCATAAAAGAAATCTTTGACAAGGCGATTTAGCCAGAAAGATCAAC<br>CGCCCCA   |
| EPX     | GACAGGTTCTGGTGGCAGAAACGAGGTGTTTTACCAAAGACAGCGCAAGGCCCTGAGCAGAATTTCTTGTCTCGAATTATATGTGACAAT<br>ACCGGTA     |
| ETHE1   | GAGGACTCTGAACCCTCGGCTCACCTCAGCTGTGAGGAGTTTGTCAAATCATGGGCAACCTGAACTTGCTTAAACCTCAGCAGATAGACTTT<br>GCTGTT    |
| FCAR    | TGCTGAGATTATAGGCATGAGCCACCACGCCTGGCCAGATGCATGTTCAAACCAATCAAATGGTGTTCCTTATGCAGGACTGATCGATTTGCA<br>CCCACC   |
| FHL2    | CATTGCAACGAATCTCTCTTTGGCAAGAAGTACATCCTGCGGGAGGAGAGCCCCTACTGCGTGGTGTGCTTTGAGACCCTGTTCCGCAACACCT<br>GCGAGG  |
| FOS     | ACTCAAGTCCTTACCTCTTCCGGAGATGTAGCAAACGCATGGAGTGTGTATTGTTCCAGTGACACTTCAGAGAGCTGGTAGTTAGTAGCATG<br>TTGAGC    |
| FOXM1   | CAATTCGCCATCAACAGCACTGAGAGGAAGCGCATGACTTTGAAAGACATCTATACGTGGATTGAGGACCCTTCCCTACTTTAAGCACATT<br>GCCAAGC    |
| FTH1    | CCAAATACTTTCTTACCAATCTCATGAGGAGAGGGAACATGCTGAGAACTGATGAAGCTGCAGAACCAACGAGGTGGCCGAATCTTCCTTC<br>AGGATAT    |
| GADD45A | GTTACTCCCTACACTGATGCAAGGATTACAGAACTGATGCCAAGGGGCTGAGTGAGTTCAACTACATGTTCTGGGGGCCGGAGATAGATGA<br>CTTTGCA    |
| GCLC    | CTCAAGTGGGGCGATGAGGTGGAATACATGTTGGTATCTTTTGATCATGAAAATAAAAAAGTCCGGTTGGTCTGTCTGGGGAGAAAAGTTCTT<br>GAAACTC  |
| GCLM    | TCATCATCAACTAGAAGTGCAGTTGACATGGCCTGTTTTCAGTCTTGGAGTTGCACAGCTGGATTCTGTGATCATTGCTTACCTCCTATTGAAG<br>ATGGAG  |
| GGT1    | CATGAATGCCACAGCATGGGCATCGGGGGTGGCCTTCTCCTCACCATCTACAACAGCACACGAAAAGCTGAGGTCATCAACGCCCGCGA<br>GGTGGCC      |
| GLA     | GCTGCTCCTTTATTCATGTCTAATGACCTCCGACACATCAGCCCTCAAGCCAAAGCTCTCCTTCAGGATAAGGACGTAATTGCCATCAATCAGG<br>ACCCCT  |

|          |                                                                                                        |
|----------|--------------------------------------------------------------------------------------------------------|
| GNMT     | GCTTGAGTAAGTTCCGGCTCTCCTACTACCCACACTGTCTGGCATCCTTACGGAGCTGCTCCAAGCAGCCTTCGGAGGTAAGTGCCAGCACAGCGTCCT    |
| GOT1     | GTCCTACCAACCTGGGAGAATCACAATGCTGTGTTTTCCGCTGCTGGTTTTAAAGACATTCGGTCTATCGCTACTGGGATGCAGAGAAGAGAGGATTG     |
| GOT2     | GGAGAGTAGGAAACTGTACTTTATCTCGGCATCCTCTTGAATGATAGTGCAAGTTTTCTCCAGTTGGGATGTTGTCTCTGCCCGGTTGGACCTCCTCCCT   |
| GPX1     | GGTTTTCATCTATGAGGGTGTTCCTCTAAACCTACGAGGGAGGAACACCTGATCTTACAGAAAATACCACCTCGAGATGGGTGCTGGTCTCTGTGATCC    |
| GPX2     | CCTCTGGTTGGTGATTCAACTTGGGCTCAAGACTTGGGTAAGCTCTGGGCCTTACAGAAATGATGGCACCTTCTAAACCCTCATGGGTGGTGCTCTGAG    |
| GPX3     | GTCCAATTGTTCTGCTCTAACTGATACCTCAACCTTGGGGCCAGCATCTCCACTGCCTCCAAATATTAGTAACTATGACTGACGTCCCCAGAAAGTTTCT   |
| GPX4     | CAGGGAGTAACGAAGAGATCAAAGAGTTCGCCGCGGGCTACAACGTCAAATTCGATATGTTTCAGCAAGATCTGCGTGAACGGGGACGACGCCCACCCGCT  |
| GPX5     | CATCCTGAAGAACATTCCTAGACATTCTGACTCTTCCATCTCTCTACCCTGGAGGTGTAGAAATAGCAATGGGGTACAGTACACAAATTTAGGTTCC      |
| GSR      | ATGCAGGGACTTGGGTGTGATGAAATGCTGCAGGGTTTTGCTGTTGCAGTGAAGATGGGAGCAACGAAGGCAGACTTTGACAACACAGTCGCCATTACCC   |
| GSS      | CAACCAGGCCACGGGACCTTCTATCCTCTGTATTTGTCATTCTCTCCTAGCCCTCCTGAGGGGTATCCTCCTAAAGACCTCCAAAGTTTTTATGGAAGG    |
| GSTP1    | TTTTGAGACCCTGCTGTCCAGAACCAGGGAGGCAAGACCTTATTGTGGGAGACCAGATCTCCTTCGCTGACTACAACCTGCTGGACTTGCTGCTGATC     |
| GSTZ1    | CGTAACACCACGGGAAGGCTGTGTGCCTTTTCTCATCCGCTTTTGTGTGTGTGACTCCAAAGAATGCCCGCGTGAAATTTGGCGTGAATTAAGTGA       |
| GUSB     | CCGATTTTACTGACTGAACAGTCACCGACGAGAGTCTGGGGAATAAAAAGGGGATCTTCACTCGGCAGAGACAACCAAAAAGTGCAGCGTTCCTTTGCG    |
| HMOX1    | TGTTGTTTTTATAGCAGGGTTGGGGTGGTTTTTGTAGCCATGCGTGGGTGGGAGGGAGGTGTTTAAACGGCACTGTGGCCTGGTCTAACTTTGTGTGAA    |
| HPRT1    | TGTGATGAAGGAGATGGGAGGCCATCACATTGTAGCCCTCTGTGTGCTCAAGGGGGGCTATAAATCTTTGCTGACCTGCTGGATTACATCAAAAGACTG    |
| HSP90AA1 | CTTGACCAATGACTGGGAAGATCACTTGGCAGTGAAGCATTTTTTTCAGTTGAAGGACAGTTGGAATTCAGAGCCCTTCTATTTGTCCCACGACGTGCTCCT |
| HSP90AB1 | AGCCAATATGGAGCGGATCATGAAAGCCCAGGCACTTCGGGACAACCTCACCATGGGCTATATGATGGCCAAAAGCACCTGGAGATCAACCCTGACCAC    |
| HSPA1A   | GCTTCCCAGAGCGAACCTGTGCGGCTGCAGGCACCGGCGGTCGAGTTTTCCGGCGTCCGGAAGGACCGAGCTCTTCTCGCGGATCCAGTGTTCCCGTTTCC  |
| HTATSF1  | CTTTGATAGGCACCCAGATGGTGTGGCCTCTGTGTCTTTTCCGGATCCAGAGGAAGCTGATTATTGTATTCACTCTCGATGGAAGATGGTTTTGGTGGC    |



|        |                                                                                                           |
|--------|-----------------------------------------------------------------------------------------------------------|
| IFNA1  | ATCCCTCTCTTTATCAACAAACTTGCAAGAAAGATTAAGGAGGAAGGAATAACATCTGGTCCAACATGAAAACAATTCTTATTGACTCATA<br>CCAGGTC    |
| IFNB1  | ACAGACTTACAGGTTACCTCCGAAACTGAAGATCTCCTAGCCTGTGCCTCTGGGACTGGACAATTGCTTCAAGCATTCTTCAACCAGCAGATGC<br>TGTTTA  |
| IFNG   | ATACTATCCAGTTACTGCCGTTTTGAAAATATGCCTGCAATCTGAGCCAGTGCTTTAATGGCATGTCAGACAGAACTTGAATGTGTCAGGTGAC<br>CCTGAT  |
| IL10   | AAGGATCAGCTGGACAACCTTGTGTTAAAGGAGTCCTTGCTGGAGGACTTTAAGGGTTACCTGGGTTGCCAAGCCTTGTCTGAGATGATCCAGT<br>TTTACC  |
| IL12B  | GCAAGGCTGCAAGTACATCAGTTTTATGACAATCAGGAAGAATGCAGTGTCTGATACCAGTGCCATCATACTTGTGATGGATGGGAACGC<br>AAGAGAT     |
| IL16   | TCCTGTGAGACGAAGCTACTTGACGAAAAGACCAGCAAACCTCTATTCTATCAGCAGCCAAGTGTATCGGCTGTCATGAAATCCTTGCTGTGCC<br>TTCCAT  |
| IL1B   | GGGACCAAAGGCGGCCAGGATATAACTGACTTCACCATGCAATTTGTGTCTTCCTAAAGAGAGCTGTACCCAGAGAGTCCTGTGCTGAATGTG<br>GACTCAA  |
| IL2    | AGGATGCAACTCCTGTCTTGCATTGCACTAAGTCTTGCACCTTGTACAAAACAGTGCACCTACTTCAAGTTCTACAAAGAAAACACAGCTACAAC<br>TGGAGC |
| IRF1   | CTGTGCGAGTGTACCGGATGCTTCCACCTCTCACCAAGAACCAGAGAAAAGAAAGAAAGTCAAGTCCAGCCGAGATGCTAAGAGCAAGGCC<br>AAGAGGAA   |
| IRF2   | AGGCAGCACTAGCGACATTGCAGTCTGCTTCTGCACCTTATCTTAAAGCACTTACAGATAGGCCTTCTTGTGATCTTGTCTATCTCACAGCACA<br>CTCAG   |
| KLRD1  | CAATTTTACTGGATTGGACTCTCTTACAGTGAGGAGCACACCCGCTGGTTGTGGGAGAATGGCTCTGCACTCTCCAGTATCTATTTCCATCATT<br>TGAAA   |
| KRT1   | TGCAGCAGGTAGATACCTCCACTAGAACCCATAATTTAGAGCCCTACTTTGAGTCATTCATCAACAATCTCCGAAGGAGAGTGGACCAACTGA<br>AGAGTGA  |
| LDHA   | AACTTCCTGGCTCCTTCACTGAACATGCCTAGTCCAACATTTTTTCCAGTGAGTCACATCCTGGGATCCAGTGTATAAATCCAATATCATGTCT<br>TGTGC   |
| LHPP   | ACCATACCTGCTCATCCATGACGGAGTCCGCTCAGAATTTGATCAGATCGACACATCCAACCCAAACTGTGTGGTAATTGCAGACGCAGGAGA<br>AAGCTTT  |
| LPO    | CTGCTGGCCAAGAAATCCAAGCTGATGAAACAGAATAAAATGATGACTGGAGAGCTGCGCAACAAGCTTTTCCAGCCAACTCACAGGATCCAT<br>GGCTTTG  |
| LTBR   | GTGCTGCCTGGGCCCTCGAGTGTACACACTGCGAGCTACTTTCTGACTGCCCGCCTGGCACTGAAGCCGAGCTCAAAGATGAAGTTGGGAAGG<br>GTAACAA  |
| MAP3K5 | TTTAGGAAAAGGCACCTTATGGGATAGTCTACGCAGGTCGGGACTTGAGCAACCAAGTCAGAATTGCTATTAAGGAAATCCCAGAGAGAGACA<br>GCAGATAC |
| MAT1A  | GGGGATTAACCCACTAGCTCTTGTGAGCCGTGGGCAATTGTCTGAAAAGTGAAGACAGAACCACAGGGCTATTTTGTGTTGCTTCATGTGTCCC<br>AGAAGA  |
| MAT2A  | AAGCAGTTGTGCCTGCGAAATACCTTGATGAGGATACAATCTACCACCTACAGCCAAGTGGCAGATTTGTTATTGGTGGGCCTCAGGGTGATG<br>CTGGTTT  |

|        |                                                                                                           |
|--------|-----------------------------------------------------------------------------------------------------------|
| MB     | CAAGAGAGAGCGGGTCTGATCTCGTGTAGCCATATAGAGTTTGCTTCTGAGTGTCTGCTTTGTTTAGTAGAGGTGGCAGGAGGAGCTGAGG<br>GGCTGGG    |
| MBL2   | TGGACTTGTCTTTTGGTGGACATGGTGCCTAATTTCACTACCTATCCAGGAGTGGAACTGGTAGAGGATGAGGAAAGCATGTATTCAGCTTTA<br>GTAGAT   |
| MPO    | AGACCTGCTGGAGAGGAAGCTGCGGTCCCTGTGGCGAAGGCCATTCAATGTCACTGATGTGCTGACGCCCGCCAGCTGAATGTGTTGTCCAA<br>GTCAAGC   |
| MPST   | CGCGACGCGGACGCGAGTTCGAGGAGCGCCACATCCCGGGCGCCGCTTTCTTCGACATCGACCAGTGCAGCGACCCGACCTCGCCCTACGAC<br>CACATGC   |
| MPV17  | TGGTACAAGGTTTTGGATCGGTTTCATCCCTGGCACCACCAAAGTGGATGCACTGAAGAAGATGTTGTTGGATCAGGGGGGCTTTGCCCGTGT<br>TTCTAG   |
| MSRA   | TGCAGAAGTCGTCCGAGTGGTGTACCAGCCAGAACACATGAGTTTTGAGGAACTGCTCAAGGTCTTCTGGGAGAATCACGACCCGACCCAAG<br>TATGCGC   |
| MT3    | CACTAGCCAAGCCGCGCTCCAGTTGCTTGGAGAAGCCCGTTACCGCCTCCAGCTGCTGCTCTCCTCGACATGGACCCTGAGACCTGCCCTG<br>CCCTC      |
| MTR    | TGAGTGAACCTACAGCTATACTCACAAATAAGAATGAATCTCAGAAAATATTAAGGAAAAAAGCAAGTTTGAAGAGACCACATGGGGCGTACT<br>ATTTTTAT |
| NCF1   | TGAGCCTGCCACCAAGATCTCCCGCTGTCCACCTCCTCGACTTCTTCAAGGTGCGCCCTGATGACCTCAAGCTCCCCACGGACAACCAGAC<br>AAAAAA     |
| NCF2   | GCTCACCGTGTGCTATTTGGGTTTTGTGCCTGAGACAAAAGAAGAGCTCCAGGTCATGCCAGGGAACATTGTCTTTGTCTTGAAGAAGGGCAAT<br>GATAACT |
| NCOA7  | TCAGGATCTGGAGGTGTGGGCATTTGATTGAAATTCAGACTGCCTTAAATATAACATTAATAAAGACTGGGTTTCGATCAGCCCTCCTAAAGCT<br>GGCTGGA |
| NFATC1 | CGAATTCTCTGGTGGTTGAGATCCCGCCATTTCCGAATCAGAGGATAACCAGCCCCGTTACGTCAGTTTCTACGTCTGCAACGGGAAGAGAA<br>AGCGAAG   |
| NFKBIA | GGATGAGGAGAGCTATGACACAGAGTCAGAGTTCACGGAGTTCACAGAGGACGAGCTGCCCTATGATGACTGTGTGTTTGGAGGCCAGCGTCT<br>GACGTTA  |
| NOS2   | CCCAGCGGAGTGATGGCAAGCACGACTTCCGGGTGTGGAATGCTCAGCTCATCCGCTATGCTGGCTACCAGATGCCAGATGGCAGCATCAGA<br>GGGGACC   |
| NOX4   | ATAGCAAAATATAACAGAGGAAAAACAGTTGGTGTCTTTCTGTTGTGGACCCAATTCATATCCAAGACTCTTCATAAACTGAGTAACCAGAAC<br>AACTCAT  |
| NOX5   | AGCTCCATAAGGTGGACTTTATCTGGATCAACAGAGACCAGCGGTCTTTCGAGTGGTTTGTGAGCCTGCTGACTAACTGGAGATGGACCAGG<br>CCGAGGA   |
| NQO1   | CCGAATTCAAATCCTGGAAGGATGGAAGAAACGCCTGGAGAATATTTGGGATGAGACACCACTGTATTTTGTCTCAAGCAGCCTCTTTGACCT<br>AAACTTC  |
| NUDT1  | TGTGGCCCCGACGACAGCTACTGGTTTCCACTCCTGCTTCAGAAGAAGAAATTCCACGGGTACTTCAAGTTCCAGGGTCAGGACCCATCCTGG<br>ACTACAC  |
| PDLIM1 | GGATCCCAACAAGCCCTCAGGATTCAGAAGTGTAAAGCTCCTGTCACTAAAGTGGCTGCGTCGATTGGAAATGCTCAGAAGTTGCCTATGTG<br>TGACAAA   |

|        |                                                                                                        |
|--------|--------------------------------------------------------------------------------------------------------|
| POLR1B | GGAGAACTCGGCCCTTAGAATACTTTGGTGAGATGTTAAAGGCTGCTGGCTACAATTTCTATGGCACCGAGAGGTTATATAGTGGCATCAGTGGGCTAGAA  |
| PPIA   | GGAATATTGAAAATGTAGGCAGCAACTGGGCATGGTGGCTCACTGTCTGTAATGTATTACCTGAGGCAGAAGACCACCT                        |
| PRDX1  | GACCCATGAACATTCCTTTGGTATCAGACCCGAAGCGCACCATTTGCTCAGGATTATGGGGTCTTAAAGGCTGATGAAGGCATCTCGTTCAGGGGCCTTTT  |
| PRDX2  | GTCGGACTACAAAGGGAAGTACGTGGTCCTCTTTTTCTACCCTCTGGACTTCACTTTTGTGTGCCCCACCGAGATCATCGCGTTCAGCAACCGTGCAGAG   |
| PRDX3  | CATGGTTAGTTGCTAGTACAAGGAATCCTTTATTGGTAACATCTTGGTGGCTGGCTAGCTAGTTTCTACAGAACATAATTTGCCTCTATAGAAGGCTATT   |
| PRDX4  | AGGAGGACTTGGGCAATAAGGATTCCAATTCTTTCAGATTTGACCCATCAGATCTCAAAGGACTATGGTGTATACCTAGAGGACTCAGGCCA CACTCTT   |
| PRDX5  | GGAAGGAGACAGACTTATTACTAGATGATTGCTGGTGTCCATCTTTGGGAATCGACGTCTCAAGAGGTTCTCCATGGTGGTACAGGATGGCA TAGTGAA   |
| PRDX6  | GTGATAAGTTTCTATCAAAATGGGGAGATTGCAGAAAAGGCTTCCCTTGGCTCCCAAGGAGGTGTAGCAGGTGTGAGCAATATTAGTGCCATG TGCCTTT  |
| PRNP   | GCATGAGCTCTGTGTGTACCGAGAAGTGGGGTGATGTTTTACTTTTTACAGTATGGGCTACACAGCAGCTGTTCAACAAGAGTAAATATTGTCA CAACAC  |
| PTGR1  | TGATAATGTAGGTGGAGAGTTTTCAAACACTGTTATCGGCCAGATGAAGAAATTTGGAAGGATTGCCATATGTGGAGCCATCTCTACATATAA CAGAACC  |
| PTGS1  | ACCCCCAAGGCACCAACCTCATGTTTGCCTTCTTTGCACAACACTTCACCCACCAGTTCTTCAAACCTTCTGGCAAGATGGGTCCTGGCTTACC AAGGC   |
| PTGS2  | GCTACAAAAGCTGGGAAGCCTTCTAACCTCTCCTATTATACTAGAGCCCTTCCCTCTGTGCCTGATGATTGCCGACTCCCTTGGGTGTCAA AAGTAA     |
| PTK2B  | CCAGTAGATGTGGAAAAGGAGGACGTGCGTATCCTCAAGGTCTGCTTCTATAGCAACAGCTTCAATCCTGGGAAAAACTTCAAACCTGGTCAA A TGCCTG |
| RBL2   | GAATCTCCACACCACTAACTGGTGTTAGGTACATTAAGGAGAATAGCCCTTGTGTGACTCCAGTTTCTACAGCTACGCATAGCTTGAGTCGTCT TCACAC  |
| RNF7   | TTCAGAGCCCTGGTGGATCTTGTAATCCAGTGCCCTACAAAGGCTAGAACACTACAGGGGATGAATTCTTCAAATAGGAGCCGATGGATCTGT GGTCTT   |
| RPLP0  | CGAAATGTTTCATTGTGGGAGCAGACAATGTGGGCTCCAAGCAGATGCAGCAGATCCGCATGTCCCTTCGCGGAAGGCTGTGGTGTCTGATGG GCAAGAA  |
| SEPP1  | GGAGCATAAGAGATCAAGATCCAATGCTAAACTCCAATGGTTCAGTGAAGTGTGGTTGCTCTTCTTCAAGCCAGCTGATACCTGTGCATACTGCA GGCATC |
| VIMP   | GAAATGCAAAGAAGCCCCAGGAGGAAGACAGTCTGGGCCTTCCAATTCTGTCTGAAACGGAATCGGACAGAAAGCCTTTGCGGGGA GGAGGTTA        |
| SELL   | CTAACTCCAGTGAAGTAATGGGGTCTGCTCAAGTTGAAAGAGTCTATTTGCACTGTAGCCTCGCCGTCTGTGAATTGGACCATCCTATTTAA CTGGCT    |

|          |                                                                                                       |
|----------|-------------------------------------------------------------------------------------------------------|
| SERPINA1 | TC ACTGTCAACTTCGGGGACACCGAAGAGGCCAAGAAACAGATCAACGATTACGTGGAGAAGGGTACTCAAGGGAAAATTGTGGATTTGGTCAAGGAGCT |
| SERPINC1 | TCAAGGCCAACAGGCCTTTCTGGTTTTTATAAGAGAAGTTCCTCTGAACACTATTATCTTCATGGGCAGAGTAGCCAACCCTTGTGTAAAGTAAATGT    |
| SFTPD    | AAAGTGGGCTTCCAGATGTTGCTTCTCTGAGGCAGCAGGTTGAGGCCTTACAGGGACAAGTACAGCACCTCCAGGCTGCTTTCTCTCAGTATAAGAAAGT  |
| SIRT2    | CTATGACAACCTAGAGAAGTACCATCTTCCCTACCCAGAGGCCATCTTTGAGATCAGCTATTTCAAGAAACATCCGGAACCCTTCTTCGCCCTCGCCAAG  |
| SLC7A11  | TCCATTACCAGCTTTTGTACGAGTCTGGGTGGAACCTCATAATACGCCCTGCAGCTACTGCTGTGATATCCCTGGCATTGGACGCTACATTCGTTGGAA   |
| SLPI     | TTTCTGTGAGATGGATGGCCAGTGCAAGCGTGACTTGAAGTGTTCATGGGCATGTGTGGGAAATCCTGCGTTTCCCCTGTGAAAGCTTGATTCCTGCCA   |
| SMARCB1  | AGAAGGAGAACTACCAGAGAAGTTTGCCTGAAGCTGTGCTCGGAGCTGGGGTTGGGCGGGGAGTTTGTACCACCATCGCATAACAGCATCCGGGGACA    |
| SOD1     | GCCTATAAAGTAGTCGCGGAGACGGGGTGTGTTTGCCTCGTAGTCTCCTGCAGCGTCTGGGGTTTCCGTTGCAGTCCCGGAACCAGGACCTCGGCGT     |
| SOD2     | TTTGGGGTATCTGGGCTCCAGGCAGAAGCACAGCCTCCCCGACCTGCCCTACGACTACGGCGCCCTGGAACCTCACATCAACGCGCAGATCATGCAGCTG  |
| SOD3     | GGTGCAGCTCTCTTTTTCAGGAGAGAAAGCTCTCTTGGAGGAGCTGGAAGGTGCCCGACTCCAGCCATGCTGGCGCTACTGTGTTCCCTGCCTGCTCCTGG |
| SPINK1   | GACGTGGTAAGTGCAGTTTCAACTGACCTCTGGACGCAGAACTTCAGCCATGAAGGTAACAGGCATCTTCTTCTCAGTGCCTTGCCCTGTTG          |
| SQRDL    | AAAGAGTTCCTTGATGGGTAATGGTGACCAAATGCCTCCCTTTTTCAGTACCTTTGAACAGCAACCATGTGGGCTACTCATGATGGGCTTGATTCCTTGGG |
| SQSTM1   | GGGCCAGTTTCTCTGCCTTCTTCCAGGATCAGGGGTTAGGGTGCAAGAAGCCATTTAGGGCAGCAAAACAAGTGACATGAAGGGAGGGTCCCTGTGTGTG  |
| SRXN1    | AAGAGAGTGAGAGTAGAAGCTGAAAGACTTCTTGAGTTCTTGGCCTGGAACCTGGGACTAGGACAGTGTCACTTCTGCTAAGTTCTTTTGGTCAAGACAAA |
| STAT1    | ACAGTGGTTAGAAAAGCAAGACTGGGAGCACGCTGCCAATGATGTTTCATTTGCCACCATCCGTTTTTCATGACCTCCTGTACAGCTGGATGATCAATAT  |
| STAT3    | AAAGAAGGAGGCGTCACTTTCCTTGGGTGGAGAAGGACATCAGCGGTAAGACCCAGATCCAGTCCGTGGAACCATAACAAAGCAGCAGCTGAACAACA    |
| SUOX     | GGCGGGATTACAAAGGCTTCTCTCCATCTGTGGACTGGGAGACTGTAGATTTTACTCTGCTCCATCCATTCAGGAACCTTCTGTCCAGTCCGGCCATCAC  |
| TGFB1    | TATATGTTCTTCAACACATCAGAGCTCCGAGAAGCGGTACCTGAACCCGTGTTGCTCTCCCGGGCAGAGCTGCGTCTGCTGAGGCTCAAGTTAAAGTGG   |
| TNF      | AGCAACAAGACCACCTTCGAAACCTGGGATTCAGGAATGTGTGGCCTGCACAGTGAAGTGTGGCAACCACTAAGAATTCAAACCTGGGGCTCCAGAA     |

|          |                                                                                                       |
|----------|-------------------------------------------------------------------------------------------------------|
| TNFRSF1B | CCCAGCTGAAGGGAGCACTGGCGACTTCGCTCTTCCAGTTGGACTGATTGTGGGTGTGACAGCCTTGGGTCTACTAATAATAGGAGTGGTGAACTGTGTC  |
| TNFSF10  | GGGGGGACCCAGCCTGGGACAGACCTGCGTGCTGATCGTGATCTTCACAGTGCTCCTGCAGTCTCTCTGTGTGGCTGTAACCTTACGTGTACTTTACCAAC |
| TPO      | CTCCAGCTCAGCTTCTGTCTTTTTCCAACTTCCTGAGCCAACAAGCGGAGTGATTGCCCCGAGCAGCAGAGATAATGGAAACATCAATACAAGCGATGAA  |
| TRAPPC6A | CCTGCGCGGGCGCCCTCTATACCCTGGGCATTGAGAGCGTGGTCACCGCCTCCGTGGCAGCCCTGCCCGTCTGTAAGTTCAGGTGGTGATTCCGAAATCC  |
| TRIM5    | GAAAGCTTCCTGGAAGACTCAAATACAGTATGACAAAACCAACGTCTTGGCAGATTTTGAGCAACTGAGAGACATCCTGGACTGGGAGGAGAGCAATGAG  |
| TST      | CCTCTTAGGTGAAGGAGATGACATGTTTTTAGAATTGCTGTGCAAGGCTCACCTCTCTCTGTCAACACTGGAATAAACTTTGCCTTTTCTGAGTAGTGA   |
| TTN      | GTGCCTGAGGCTCCCAAAGAAGTTGTTCTGAAAAGAAAGTGCCAGTGCCTCCTCTAAAAGCCTGAAGTGCCACCCACAAAAGTCCCAGAGGTGCCAA     |
| TXN      | CAGCCAAGATGGTGAAGCAGATCGAGAGCAAGACTGCTTTTCAGGAAGCCTTGGACGCTGCAGGTGATAAACTTGTAGTAGTTGACTTCTCAGCCACGTG  |
| TXNRD1   | AGTGATGATCTTTTCTCCTTGCCTTACTGCCCGGGTAAGACCCTGGTTGTTGGAGCATCCTATGTCGCTTTGGAGTGCGCTGGATTCTTGCTGGTATTG   |
| TXNRD2   | TTTAACATCAAAGCCAGCTTTGTTGACGAGCACACGGTTTGCGGCGTTGCCAAAGGTGGGAAAGAGATTCTGCTGTCAGCCGATCACATCATCATTTGCTA |
| UCP2     | CTGCCGTGTTCTCCCTGCGGCTCGGACACATAGTATGACCATTAGGTGTTTCGTCTCCCACCCATTTTCTATGGAAAACCAAGGGGATCGGGCCATGATA  |
| VPS4A    | CAAGCTCTGCCTCAAAGACCGAGTGACATAAGCCATTCCCACCTCCTAGGTTACATCCAGGGCTGTGTCTTCCTTGGGGGAGGAGATGGTGTGCGTTA    |
| XCL1     | CCTCACTACCAGCGACTGCCGGTTAGCAGAATCAAGACCTACACCATCACGGAAGGCTCCTTGAGAGCAGTAATTTTTATTACCAAACGTGGCCTAAAA   |
| XPO1     | AATCTTTCTTCAGGAATATGTGGCTAATCTCCTTAAGTCGGCCTTCCTCACCTACAAGATGCTCAAGTAAAGCTCTTGTGACAGGGCTTTTCAGCTTA    |
| YY1      | GACCCTGGAGGGCGAGTTCTCGGTACCATGTGGTCTCAGATGAAAAAAAAAGATATTGACCATGAGACAGTGGTTGAAGAACAGATCATTGGAGAGAAC   |

114

115

116

117 Appendix Table S2. Normalized intensity values of differentially expressed gene in nCounter Gene Expression Assay

| Probe Name | Accession No.  | <sup>a</sup> UT1 | UT2     | UT3     | <sup>b</sup> PMA1 | PMA2    | PMA3    | <sup>c</sup> Vs1 | Vs2     | Vs3     | <sup>d</sup> Vs+PMA1 | Vs+PMA2 | Vs+PMA3 |
|------------|----------------|------------------|---------|---------|-------------------|---------|---------|------------------|---------|---------|----------------------|---------|---------|
| APOBEC3G   | NM_021822.2    | 117.74           | 93.09   | 111.61  | 87.34             | 113.45  | 101.48  | 107.99           | 97.01   | 130.42  | 61.14                | 44.6    | 72.24   |
| BAD        | NM_004322.3    | 225.19           | 187.96  | 150.62  | 85.15             | 146.97  | 104.26  | 25.6             | 26.95   | 42.87   | 22.48                | 37.66   | 35.14   |
| BAG2       | NM_004282.3    | 835.59           | 732.16  | 1116.11 | 424.67            | 523.4   | 760.43  | 422.35           | 411.14  | 540.83  | 210.39               | 174.43  | 274.32  |
| BANF1      | NM_001143985.1 | 2553.64          | 2298.53 | 2576.81 | 1136.45           | 1170.57 | 1433.27 | 1215.85          | 1169.51 | 1543.14 | 811.9                | 668.97  | 1234.92 |
| BAX        | NM_138761.3    | 3456.68          | 3294.74 | 3130.53 | 2042.55           | 2029.16 | 1864.22 | 1414.23          | 1331.97 | 1765.68 | 636.57               | 546.08  | 1118.75 |
| BCL2       | NM_000657.2    | 587.54           | 564.79  | 494.12  | 164.84            | 167.59  | 197.4   | 137.58           | 157.83  | 228.92  | 119.58               | 78.29   | 96.65   |
| BNIP3      | NM_004052.2    | 863.03           | 750.96  | 1115.03 | 364.62            | 453.79  | 486.56  | 639.12           | 436.55  | 536.27  | 738.17               | 969.27  | 257.72  |
| CASP3      | NM_032991.2    | 1707.76          | 1654.98 | 1758.69 | 1118.98           | 1175.73 | 1498.61 | 959.88           | 947.78  | 1072.54 | 724.68               | 506.44  | 774.14  |
| CASP8      | NM_001228.4    | 948.76           | 826.15  | 786.7   | 852.61            | 912.73  | 804.91  | 675.92           | 682.92  | 606.5   | 439.67               | 232.9   | 391.46  |
| CAT        | NM_001752.2    | 10451.2          | 9596.01 | 10668.1 | 1033.83           | 1309.8  | 1832.25 | 2229.33          | 2223.54 | 3752.98 | 2005.02              | 1654.1  | 3383.57 |
| CCL2       | NM_002982.3    | 124.6            | 103.83  | 71.52   | 2105.87           | 1926.02 | 955.05  | 7369.52          | 7910.96 | 5013.39 | 4399.36              | 2011.88 | 1972.94 |
| CCL3       | NM_002983.2    | 145.17           | 104.72  | 136.53  | 57120.4           | 45701.2 | 60588   | 2458.9           | 2428.34 | 1879.68 | 16935.7              | 19038.5 | 11215.8 |
| CCL4       | NM_002984.2    | 17.48            | 15.07   | 15.19   | 8804.47           | 10236   | 9745.12 | 181.58           | 207.88  | 116.74  | 1960.96              | 6464.77 | 3311.33 |
| CCL8       | NM_005623.2    | 17.48            | 15.07   | 15.19   | 16.82             | 22.63   | 15.02   | 173.58           | 185.55  | 46.51   | 22.48                | 30.72   | 16.32   |
| CCR2       | NM_001123041.2 | 25.15            | 25.96   | 28.17   | 19.65             | 61.88   | 15.02   | 17.91            | 18.48   | 14.69   | 16.09                | 11.62   | 20.5    |
| CDK7       | NM_001799.2    | 632.12           | 635.5   | 659.92  | 569.86            | 538.87  | 703.43  | 255.97           | 227.9   | 347.48  | 232.87               | 246.78  | 320.2   |
| CDK9       | NM_001261.2    | 608.12           | 634.6   | 599.23  | 425.76            | 355.81  | 346.15  | 277.57           | 255.61  | 384.87  | 208.59               | 228.94  | 165.96  |
| CDKN1A     | NM_000389.2    | 352.07           | 350.87  | 248.15  | 7788.11           | 7044.04 | 11920.7 | 1926.17          | 1966.38 | 1427.32 | 3260.18              | 2727.43 | 2692.41 |
| CEBPB      | NM_005194.2    | 6587.58          | 5936.08 | 4550.06 | 11952.9           | 10344.3 | 9907.77 | 5682.52          | 5585.8  | 5743.01 | 6426.86              | 4996    | 4635.09 |
| COPS6      | NM_006833.4    | 9499.01          | 8990.05 | 9159.71 | 4711.73           | 4496.63 | 4826.68 | 3989.12          | 3825.75 | 5850.63 | 3092.05              | 2338.93 | 4694.64 |
| CXCL8      | NM_000584.2    | 1827.79          | 1543.99 | 2689.51 | 61420.6           | 58154.6 | 156598  | 51975.4          | 45290.8 | 97424.2 | 90665.6              | 235659  | 161405  |
| CXCR4      | NM_003467.2    | 20556            | 20851.5 | 17061.4 | 475.98            | 502.78  | 247.45  | 3118.83          | 2744.78 | 2085.8  | 1186.83              | 3079.26 | 185.48  |
| DHCR24     | NM_014762.2    | 2024.4           | 3779.87 | 1095.52 | 2049.1            | 2178.7  | 2047.73 | 629.52           | 654.44  | 778.87  | 682.43               | 386.52  | 438.32  |
| FOS        | NM_005252.2    | 516.67           | 480.65  | 595.98  | 1429.02           | 1327.85 | 1391.56 | 432.75           | 422.69  | 476.99  | 684.22               | 1427.15 | 615.02  |
| FOXMI      | NM_202002.1    | 2035.83          | 2042.54 | 1984.08 | 1043.65           | 1147.36 | 1402.69 | 1256.65          | 1319.65 | 1629.79 | 1060.05              | 600.59  | 1165.6  |
| FTH1       | NM_002032.2    | 62320.8          | 76603.4 | 54991.9 | 319563            | 306692  | 298112  | 110951           | 112593  | 119137  | 156265               | 153698  | 149725  |
| GCLC       | NM_001498.2    | 1377.41          | 1209.23 | 1322    | 1227.06           | 1206.67 | 1577.85 | 489.54           | 454.25  | 662.13  | 355.15               | 246.78  | 381.7   |

|          |                |         |         |         |         |         |         |         |         |         |         |         |         |
|----------|----------------|---------|---------|---------|---------|---------|---------|---------|---------|---------|---------|---------|---------|
| GGT1     | NM_001032364.2 | 189.75  | 200.49  | 173.38  | 58.95   | 105.71  | 73.68   | 155.98  | 148.6   | 176.93  | 180.72  | 140.73  | 132.77  |
| GPX1     | NM_000581.2    | 3066.89 | 1891.28 | 2350.34 | 900.64  | 1039.07 | 924.47  | 788.71  | 927.76  | 1016.91 | 438.77  | 320.12  | 620.88  |
| GPX4     | NM_001039847.1 | 7666.65 | 7403.1  | 6995.75 | 6132.02 | 7361.17 | 6732.61 | 2885.25 | 3113.57 | 4016.55 | 3431.91 | 3125.85 | 3985.9  |
| GSS      | NM_000178.2    | 941.9   | 847.63  | 892.89  | 418.12  | 520.83  | 560.24  | 259.17  | 267.16  | 398.55  | 224.78  | 180.38  | 335.82  |
| GSTP1    | NM_000852.2    | 24463.1 | 21326.8 | 24477.5 | 8404.91 | 8518.85 | 12620   | 10428.4 | 10586.5 | 14563.2 | 9960.37 | 8049.5  | 12209.6 |
| HSP90AA1 | NM_001017963.2 | 38620.2 | 37539.1 | 36804.6 | 19307.6 | 22001   | 26589.9 | 19052.9 | 19369.7 | 23375.2 | 14271.6 | 10324   | 19865.1 |
| IL10     | NM_000572.2    | 17.48   | 17.01   | 15.19   | 16.82   | 22.63   | 41.71   | 167.98  | 131.66  | 51.07   | 16.09   | 29.73   | 20.5    |
| IL16     | NM_001172128.1 | 83.44   | 98.46   | 69.35   | 80.78   | 108.29  | 65.34   | 36.8    | 40.04   | 57.46   | 39.56   | 29.73   | 27.33   |
| IL1B     | NM_000576.2    | 21.72   | 23.27   | 15.19   | 5568.7  | 4576.56 | 4611.21 | 1302.24 | 1325.81 | 1656.23 | 3205.34 | 19506.3 | 3593.46 |
| IRF1     | NM_002198.1    | 86.87   | 98.46   | 70.43   | 70.96   | 134.07  | 102.87  | 318.36  | 332.61  | 294.58  | 332.67  | 332.01  | 420.75  |
| LTBR     | XM_006718983.2 | 957.9   | 877.17  | 825.71  | 591.7   | 685.84  | 614.46  | 307.16  | 294.88  | 369.37  | 213.99  | 163.53  | 178.65  |
| MAT2A    | NM_005911.4    | 9373.27 | 7044.17 | 5776.7  | 4114.57 | 3797.9  | 3283.59 | 4259.49 | 4057.5  | 5530.51 | 3521.82 | 2729.42 | 3371.86 |
| NCF1     | NM_000265.4    | 2736.54 | 2482.02 | 1958.07 | 10164.7 | 9060.3  | 4669.59 | 736.71  | 724.5   | 585.52  | 300.3   | 296.33  | 239.17  |
| NCF2     | NM_000433.3    | 549.82  | 486.92  | 507.13  | 2494.51 | 2506.15 | 1544.48 | 963.08  | 990.89  | 848.18  | 311.99  | 219.03  | 264.56  |
| NCOA7    | NM_181782.3    | 315.49  | 277.47  | 249.23  | 215.06  | 221.74  | 241.89  | 352.76  | 390.35  | 672.16  | 469.34  | 575.81  | 949.86  |
| NFKBIA   | NM_020529.1    | 1314.54 | 1219.98 | 1208.22 | 3148.43 | 3065.65 | 5334.1  | 5361.76 | 5352.51 | 6410.61 | 3623.42 | 10234.8 | 7776.56 |
| NOS2     | NM_000625.4    | 32.01   | 15.22   | 20.59   | 52.4    | 139.23  | 52.83   | 32      | 16.17   | 20.98   | 25.18   | 25.77   | 30.26   |
| NQO1     | NM_000903.2    | 2116.99 | 1921.71 | 2040.43 | 2295.82 | 2511.31 | 2560.7  | 1275.85 | 1320.42 | 1804.89 | 800.21  | 686.81  | 1016.24 |
| NUDT1    | NM_002452.3    | 1114.5  | 1049.91 | 1035.93 | 421.39  | 381.59  | 546.34  | 411.15  | 417.3   | 655.74  | 329.08  | 282.46  | 522.28  |
| PRDX6    | NM_004905.2    | 2902.28 | 2828.41 | 2992.92 | 1991.24 | 1975.01 | 2247.91 | 1017.48 | 967.79  | 1700.01 | 918.89  | 764.12  | 1490.69 |
| PTGS1    | NM_000962.2    | 853.88  | 842.26  | 765.02  | 741.26  | 868.9   | 617.24  | 268.77  | 253.3   | 358.43  | 412.69  | 227.95  | 365.11  |
| PTGS2    | NM_000963.1    | 25.15   | 27.75   | 27.09   | 269.65  | 275.88  | 280.82  | 183.18  | 180.93  | 142.28  | 225.68  | 1292.36 | 267.48  |
| RBL2     | NM_005611.3    | 1012.77 | 922.81  | 733.6   | 462.88  | 466.68  | 360.05  | 221.57  | 247.92  | 296.41  | 171.73  | 111.99  | 197.2   |
| SIRT2    | NM_012237.3    | 1890.66 | 1909.18 | 1327.42 | 1135.36 | 1191.2  | 911.95  | 684.72  | 675.22  | 686.75  | 566.44  | 435.08  | 588.66  |
| SLC7A11  | NM_014331.3    | 597.83  | 688.31  | 1928.82 | 6604.72 | 6556.73 | 9800.73 | 4368.28 | 4349.3  | 7196.78 | 5595.18 | 5264.58 | 7098.09 |
| SMARCB1  | NM_003073.3    | 1444.86 | 1207.44 | 1375.09 | 818.77  | 737.41  | 975.9   | 414.35  | 438.09  | 445.98  | 259.84  | 170.46  | 370.96  |
| SOD1     | NM_000454.4    | 294.92  | 257.78  | 263.32  | 234.71  | 278.46  | 275.25  | 130.38  | 134.74  | 134.07  | 113.29  | 112.98  | 154.24  |
| SOD2     | NM_000636.2    | 1665.47 | 1585.16 | 1815.04 | 1568.76 | 1513.49 | 1441.61 | 5300.16 | 5273.21 | 5572.46 | 3248.49 | 24471.6 | 5511.73 |
| SQRDL    | NM_021199.2    | 7146.55 | 7134.58 | 9256.15 | 8510.8  | 8245.55 | 9896.65 | 4395.47 | 4069.82 | 5632.66 | 3488.56 | 2417.23 | 4607.75 |
| SQSTM1   | NM_003900.3    | 7894.12 | 8820.88 | 8751.19 | 18880.8 | 22168.6 | 24981.4 | 10975.5 | 11073   | 12606   | 9527.89 | 9885.96 | 10681.8 |
| SRXN1    | NM_080725.1    | 841.31  | 901.33  | 1664.42 | 2573.11 | 2810.4  | 6443.46 | 1870.18 | 1833.19 | 4130.56 | 1337.88 | 2206.13 | 4374.44 |

|          |             |         |         |         |         |         |         |         |         |         |         |         |         |
|----------|-------------|---------|---------|---------|---------|---------|---------|---------|---------|---------|---------|---------|---------|
| STAT3    | NM_003150.3 | 887.03  | 912.97  | 756.36  | 906.1   | 935.94  | 779.89  | 1086.27 | 1160.27 | 1091.69 | 1670.55 | 1264.61 | 1513.14 |
| TGFB1    | NM_000660.3 | 4524.32 | 3944.56 | 3916.15 | 9002.07 | 7765.97 | 8303.51 | 1766.99 | 1874.76 | 2495.3  | 1864.76 | 1182.35 | 2052.99 |
| TNF      | NM_000594.2 | 563.54  | 486.92  | 545.05  | 4455.18 | 4225.91 | 4803.05 | 882.29  | 860.77  | 1349.8  | 3558.69 | 17077.2 | 11785.9 |
| TNFRSF1B | NM_001066.2 | 868.74  | 807.35  | 702.18  | 2259.8  | 2212.22 | 2076.92 | 929.49  | 990.89  | 851.83  | 770.54  | 875.12  | 466.63  |
| TNFSF10  | NM_003810.2 | 118.88  | 81.45   | 91.02   | 26.2    | 22.63   | 15.02   | 63.99   | 56.97   | 32.83   | 28.77   | 31.71   | 28.31   |
| TXNRD2   | NM_006440.3 | 812.73  | 732.16  | 631.74  | 448.68  | 440.9   | 443.47  | 315.96  | 351.09  | 363.9   | 251.75  | 185.33  | 275.29  |
| VPS4A    | NM_013245.2 | 1071.07 | 983.68  | 967.66  | 903.92  | 825.07  | 1039.85 | 370.36  | 383.42  | 389.43  | 351.55  | 260.65  | 390.49  |
| XCL1     | NM_002995.2 | 17.48   | 15.07   | 15.19   | 16.82   | 22.63   | 27.8    | 24.8    | 19.25   | 29.18   | 18.88   | 20.81   | 31.24   |
| XPO1     | NM_003400.3 | 12952.3 | 11184.8 | 12082.2 | 6666.94 | 6270.53 | 7894.8  | 6265.65 | 5987.7  | 6107.82 | 3983.97 | 2300.28 | 3629.58 |
| YY1      | NM_003403.3 | 3752.74 | 3392.3  | 3611.65 | 1931.2  | 1879.61 | 2270.15 | 2203.74 | 2317.47 | 2713.27 | 2228.9  | 1683.83 | 2276.54 |

118

119 <sup>a</sup> UT- RNA isolated from untreated U1 cells

120 <sup>b</sup> PMA - RNA isolated from U1 cells treated with PMA (5 ng/mL)

121 <sup>c</sup> Vs - RNA isolated from U1 cells treated with Vs (50 ng/μL)

122 <sup>d</sup> Vs + PMA - RNA isolated from Vs pre-treated U1 cells exposed to PMA



123 **Appendix Table S3. Fold change (FC>1.5, p<0.05) of differentially expressed gene in nCounter Gene Expression Assay**

| <b>Probe Name</b> | <b>PMA v/s UT</b> | <b>P value</b> |
|-------------------|-------------------|----------------|
| CCL4              | 511.59            | 0.00000008     |
| CCL3              | 423.95            | 0.00000174     |
| IL1B              | 235.02            | 0.00000109     |
| CXCL8             | 41.93             | 0.00198838     |
| CDKN1A            | 27.73             | 0.00014352     |
| CCL2              | 16.12             | 0.00146677     |
| PTGS2             | 10.34             | 0.00002098     |
| TNF               | 8.46              | 0.00000429     |
| SLC7A11           | 8.12              | 0.01997531     |
| FTH1              | 4.81              | 0.00272844     |
| NCF2              | 4.14              | 0.00977636     |
| SRXN1             | 3.33              | 0.03362251     |
| NOS2              | 3.2               | 0.04910377     |
| NCF1              | 3.19              | 0.02760218     |
| NFKBIA            | 2.98              | 0.02410768     |
| TNFRSF1B          | 2.76              | 0.00123007     |
| FOS               | 2.61              | 0.00196774     |
| SQSTM1            | 2.58              | 0.00255652     |
| TGFB1             | 2.03              | 0.00039086     |
| CEBPB             | 1.9               | 0.0139956      |
| SQRDL             | 1.14              | 0.29039544     |
| SIRT2             | -1.57             | 0.04193898     |
| SMARCB1           | -1.6              | 0.01250738     |
| TXNRD2            | -1.62             | 0.0215102      |
| CDK9              | -1.64             | 0.0123567      |
| BAX               | -1.66             | 0.00024262     |
| HSP90AA1          | -1.68             | 0.02845565     |

|                   |                  |                |
|-------------------|------------------|----------------|
| FOXM1             | -1.7             | 0.02488089     |
| XPO1              | -1.74            | 0.00449176     |
| YY1               | -1.77            | 0.00345957     |
| GSS               | -1.8             | 0.01390084     |
| MAT2A             | -1.95            | 0.02567225     |
| COPS6             | -1.97            | 0.00002229     |
| BANF1             | -1.99            | 0.00369122     |
| RBL2              | -2.07            | 0.00500632     |
| BNIP3             | -2.08            | 0.00877994     |
| NUDT1             | -2.4             | 0.01187469     |
| GSTP1             | -2.42            | 0.01431701     |
| GGT1              | -2.43            | 0.0288025      |
| GPX1              | -2.51            | 0.0154972      |
| BCL2              | -3.11            | 0.00013608     |
| TNFSF10           | -4.14            | 0.00140119     |
| CAT               | -7.56            | 0.00525151     |
| CXCR4             | -49.8            | 0.00185865     |
|                   |                  |                |
|                   |                  |                |
| <b>Probe Name</b> | <b>Vs v/s UT</b> | <b>P value</b> |
| IL1B              | 74.88            | 0.00030003     |
| CCL2              | 68.11            | 0.00004715     |
| CXCL8             | 31.15            | 0.00052114     |
| CCL3              | 17.55            | 0.00003172     |
| CCL4              | 11.64            | 0.00300272     |
| CCL8              | 8.13             | 0.04187619     |
| IL10              | 6.83             | 0.03037311     |
| PTGS2             | 6.3              | 0.00068869     |
| CDKN1A            | 5.61             | 0.00040328     |
| SLC7A11           | 5.56             | 0.02786311     |
| NFKBIA            | 4.56             | 0.0003011      |

|          |       |            |
|----------|-------|------------|
| IRF1     | 3.73  | 0.00240662 |
| SOD2     | 3.19  | 0.00020199 |
| TNF      | 1.9   | 0.03868206 |
| NCF2     | 1.81  | 0.00082957 |
| FTH1     | 1.78  | 0.02239238 |
| XCL1     | 1.71  | 0.03372431 |
| CCR2     | -1.66 | 0.0175419  |
| SQRDL    | -1.67 | 0.01752221 |
| BNIP3    | -1.69 | 0.03047047 |
| CASP3    | -1.72 | 0.00158106 |
| HSP90AA1 | -1.84 | 0.00904793 |
| IL16     | -1.89 | 0.02332919 |
| BANF1    | -1.9  | 0.00894783 |
| BAG2     | -1.94 | 0.01545288 |
| XPO1     | -1.97 | 0.00197068 |
| GSTP1    | -2    | 0.01345947 |
| CDK9     | -2.04 | 0.02754754 |
| SOD1     | -2.04 | 0.00217802 |
| TGFB1    | -2.04 | 0.01129445 |
| COPS6    | -2.06 | 0.03164966 |
| TXNRD2   | -2.1  | 0.00236314 |
| BAX      | -2.2  | 0.00670195 |
| NUDT1    | -2.21 | 0.03307201 |
| GPX4     | -2.22 | 0.01107939 |
| CDK7     | -2.36 | 0.01988693 |
| PRDX6    | -2.45 | 0.03717153 |
| GCLC     | -2.46 | 0.00988473 |
| SIRT2    | -2.47 | 0.01687004 |
| VPS4A    | -2.64 | 0.00014599 |
| GPX1     | -2.64 | 0.00837197 |
| LTBR     | -2.75 | 0.00065299 |

|                   |                      |                |
|-------------------|----------------------|----------------|
| PTGS1             | -2.83                | 0.00616677     |
| GSS               | -2.96                | 0.01283299     |
| SMARCB1           | -3.09                | 0.0005954      |
| BCL2              | -3.21                | 0.01012036     |
| RBL2              | -3.48                | 0.0006676      |
| NCF1              | -3.49                | 0.00080251     |
| CAT               | -3.86                | 0.01382443     |
| BAD               | -6                   | 0.00139364     |
| CXCR4             | -7.43                | 0.00056538     |
|                   |                      |                |
|                   |                      |                |
| <b>Probe Name</b> | <b>Vs+PMA v/s UT</b> | <b>P value</b> |
| IL1B              | 314.28               | 0.00708343     |
| CCL4              | 232.23               | 0.00345796     |
| CCL3              | 120.33               | 0.00006001     |
| CXCL8             | 76.88                | 0.00058601     |
| CCL2              | 26.63                | 0.00111755     |
| TNF               | 16.86                | 0.02608006     |
| PTGS2             | 16.04                | 0.03748462     |
| CDKN1A            | 9.21                 | 0.00041176     |
| SLC7A11           | 6.41                 | 0.03120074     |
| NFKBIA            | 5.3                  | 0.03218853     |
| IRF1              | 4.26                 | 0.00041031     |
| FTH1              | 2.39                 | 0.01104969     |
| NCOA7             | 2.27                 | 0.04803209     |
| STAT3             | 1.73                 | 0.0070805      |
| YY1               | -1.75                | 0.02127443     |
| APOBEC3G          | -1.84                | 0.0319583      |
| NCF2              | -1.96                | 0.01438607     |
| GPX4              | -2.1                 | 0.00426313     |

|          |       |            |
|----------|-------|------------|
| SOD1     | -2.16 | 0.00923678 |
| MAT2A    | -2.27 | 0.01297646 |
| SQRDL    | -2.3  | 0.03057552 |
| GSTP1    | -2.35 | 0.01105065 |
| CDK7     | -2.43 | 0.01077821 |
| NQO1     | -2.46 | 0.01188985 |
| CASP8    | -2.49 | 0.03473384 |
| TGFB1    | -2.49 | 0.02615612 |
| PTGS1    | -2.52 | 0.03238737 |
| CASP3    | -2.6  | 0.01717971 |
| IL16     | -2.61 | 0.00325617 |
| HSP90AA1 | -2.63 | 0.03544743 |
| BANF1    | -2.83 | 0.02518634 |
| COPS6    | -2.85 | 0.03477488 |
| PRDX6    | -2.86 | 0.0333126  |
| NUDT1    | -2.92 | 0.02694722 |
| VPS4A    | -3.05 | 0.0081988  |
| CDK9     | -3.08 | 0.005854   |
| TXNRD2   | -3.08 | 0.00281402 |
| SIRT2    | -3.21 | 0.00192783 |
| TNFSF10  | -3.24 | 0.00521762 |
| GSS      | -3.74 | 0.01637243 |
| XPO1     | -3.75 | 0.01218524 |
| GCLC     | -4.04 | 0.0059256  |
| BAG2     | -4.08 | 0.00149844 |
| DHCR24   | -4.17 | 0.039298   |
| BAX      | -4.51 | 0.0189018  |
| CAT      | -4.57 | 0.01743295 |
| LTBR     | -4.81 | 0.00034532 |
| SMARCB1  | -5.27 | 0.01395405 |
| GPX1     | -5.39 | 0.00287154 |

|                   |                       |                |
|-------------------|-----------------------|----------------|
| RBL2              | -5.65                 | 0.00248872     |
| BCL2              | -5.66                 | 0.00159778     |
| BAD               | -5.98                 | 0.00131385     |
| NCF1              | -8.55                 | 0.0001136      |
|                   |                       |                |
|                   |                       |                |
| <b>Probe Name</b> | <b>Vs+PMA v/s PMA</b> | <b>P value</b> |
| IRF1              | 3.62                  | 0.01044566     |
| NCOA7             | 2.81                  | 0.03551667     |
| GGT1              | 1.94                  | 0.03935274     |
| STAT3             | 1.69                  | 0.00840496     |
| APOBEC3G          | -1.72                 | 0.0415904      |
| BCL2              | -1.82                 | 0.02385733     |
| CDK9              | -1.88                 | 0.00788836     |
| TXNRD2            | -1.9                  | 0.03305617     |
| CASP3             | -1.91                 | 0.01986873     |
| GPX4              | -1.92                 | 0.00240168     |
| FTH1              | -2.01                 | 0.00003832     |
| CEBPB             | -2.02                 | 0.00716749     |
| SIRT2             | -2.04                 | 0.00504856     |
| GSS               | -2.08                 | 0.03870124     |
| SOD1              | -2.09                 | 0.00769812     |
| XPO1              | -2.15                 | 0.03193456     |
| SQSTM1            | -2.18                 | 0.0046803      |
| PTGS1             | -2.26                 | 0.02714952     |
| CDK7              | -2.27                 | 0.00333011     |
| CASP8             | -2.5                  | 0.03865341     |
| BAG2              | -2.56                 | 0.01373747     |
| IL16              | -2.61                 | 0.00778681     |
| SQRDL             | -2.61                 | 0.02750844     |
| BAX               | -2.71                 | 0.04251708     |

|          |        |            |
|----------|--------|------------|
| RBL2     | -2.74  | 0.01386341 |
| VPS4A    | -2.79  | 0.0044181  |
| NQO1     | -2.98  | 0.00686467 |
| CDKN1A   | -3.01  | 0.01214941 |
| TNFRSF1B | -3.21  | 0.02442046 |
| SMARCB1  | -3.3   | 0.02314604 |
| LTBR     | -3.42  | 0.00068482 |
| CCL3     | -3.52  | 0.00581069 |
| BAD      | -3.53  | 0.00515393 |
| GCLC     | -4.12  | 0.00182672 |
| DHCR24   | -4.29  | 0.01277996 |
| TGFB1    | -5.04  | 0.00783462 |
| NCF2     | -8.11  | 0.0009037  |
| NCF1     | -27.24 | 0.00293334 |

124

125

126 **Appendix Table S4. Details of HIV-infected subject used in the study.**

| SL. NO. | Subject code | Duration of infection | CD4 <sup>+</sup> T cell count (cell/mm <sup>3</sup> ) <sup>#</sup> | Viral load (copies/ml) <sup>\$</sup> |
|---------|--------------|-----------------------|--------------------------------------------------------------------|--------------------------------------|
| 1       | Subject A    | 9 years               | 327                                                                | Target not detected                  |
| 2       | Subject B    | 6 years               | 642                                                                | Target not detected                  |
| 3       | Subject C    | 11 years              | 351                                                                | Target not detected                  |

127 <sup>#</sup> CD4<sup>+</sup> T cell count was evaluated by flow cytometry.

128 <sup>\$</sup> Viral copies were evaluated by p24 ELISA. Detection limit – 20 pg/mL.

129

130 **Appendix Table S5. List of primers used in the study.**

| Primer sequences                                           |                              |
|------------------------------------------------------------|------------------------------|
| Total HIV <i>gag</i> and $\beta$ -actin mRNA in cell lines |                              |
| HIV <i>gag</i> F                                           | ATAATCCACCTATCCCAGTAGGAGAAAT |
| HIV <i>gag</i> R                                           | TTGGTTCCTTGCTTATGTCCAGAATGC  |
| $\beta$ -actin F                                           | ATGTGGCCGAGGACTTTGATT        |
| $\beta$ -actin R                                           | AGTGGGGTGGCTTTTAGGATG        |
| Total HIV DNA and mRNA in primary cells                    |                              |
| CD3OUT5                                                    | ACTGACATGGAACAGGGGAAG        |
| CD3OUT3                                                    | CCAGCTCTGAAGTAGGGAACATAT     |
| CD3IN5                                                     | GGCTATCATTCTTCTCAAGGT        |



|                             |                                        |
|-----------------------------|----------------------------------------|
| CD3IN3                      | CCTCTCTTCAGCCATTTAAGTA                 |
| CD3 Taq                     | LC640AGCAGAGAACAGTTAAGAGCCTCCAT-BBQ    |
| HIV L1                      | ATGCCACGTAAGCGAAACTCTGGGTCTCTCTDGTAGAC |
| HIV R1                      | CCATCTCTCTCCTTCTAGC                    |
| HIV L2                      | ATGCCACGTAAGCGAAACT                    |
| HIV R2                      | CTGAGGGATCTCTAGTTACC                   |
| HIV Taq                     | LC640-CACTCAAGGCAAGCTTTATTGAGGC-BBQ    |
| Antioxidant gene expression |                                        |
| GPX1 F                      | CAACCAGTTTGGGCATCAG                    |
| GPX1 R                      | GTTACCTCGCACTTCTCG                     |
| GPX4 F                      | GCCTTCCCGTGTAACCAGT                    |
| GPX4 R                      | GCGAACTCTTTGATCTCTTCGT                 |
| GSR F                       | CTTGCGTGAATGTTGGATGT                   |
| GSR R                       | GACCTCTATTGTGGGCTTGG                   |
| B2M F                       | GCCCAAGATAGTTAAGTGGGATCG               |
| B2M R                       | TCATCCAATCCAAATGCGGC                   |

131  
132  
133

134

135  
136
